# Supplementary material for: A facile fluorescence method for endonuclease detection using exonuclease III-aided signal amplification of a molecular beacon
Source: Royal Society of Chemistry journal article supplement (doi:10.1039/c4ra09676b), 2014-10-10
Supplement: c4ra09676b1.pdf [file c4ra09676b1.pdf]

## Supporting Information

### **A facile fluorescence method for endonuclease detection using exonuclease III-aided signal amplification of molecular beacon**

**Chan Song,<sup>a,b</sup> Qi Zhang,<sup>a,b</sup> Gui-Mei Han,<sup>a,b</sup> Yi-Chen Du<sup>a,b</sup> and De-Ming Kong<sup>\*a,b</sup>**

<sup>a</sup> State Key Laboratory of Medicinal Chemical Biology, College of Chemistry, Nankai University, Tianjin 300071, China.

<sup>b</sup> Collaborative Innovation Center of Chemical Science and Engineering (Tianjin), Tianjin 300071, China.

E-mail: kongdem@nankai.edu.cn; Fax: (+86)-22-23502458; Tel: (+86)-22-23500938

Table S1 The oligonucleotides used in this work.

| Oligonucleotides    | Oligonucleotide Sequences (5' to 3')                                 |
|---------------------|----------------------------------------------------------------------|
| Hairpin substrate 1 | TACGACGATGCTCTGAGAAATTCCTTTTGA <b>GAATTC</b> TCAGACATCGTCGTAGCTTTTTT |
| Hairpin substrate 2 | TACGACGATGCTCTGAGGATCCCTTTTGA <b>GGATCC</b> TCAGACATCGTCGTAGCTTTTTT  |
| MB                  | (DABCYL)-CATCG <b>AAGCTACGACGATGCTGA</b> -(FAM)                      |

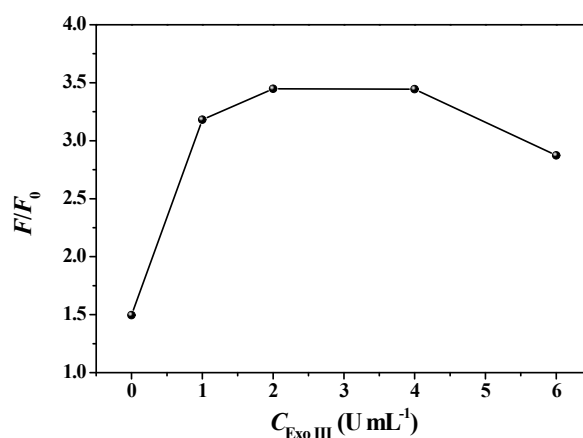

**Fig. S1** Signal-to-noise ( $F/F_0$ ) with different amounts of Exo III.  $F_0$  and  $F$  are the fluorescence intensity in the absence and presence of  $100 \text{ U mL}^{-1}$  EcoRI, respectively. [Hairpin substrate 1] =  $100 \text{ nM}$ , [MB] =  $200 \text{ nM}$ .

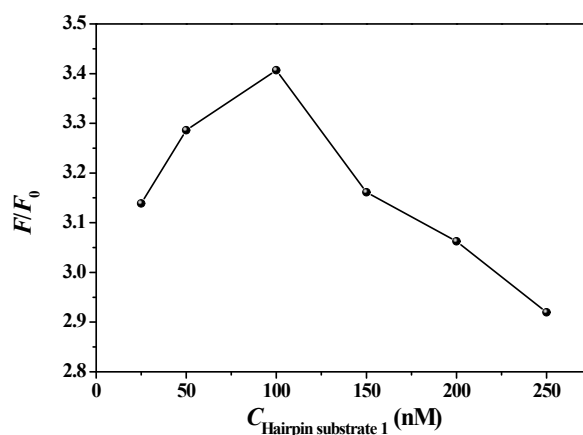

**Fig. S2** Signal-to-noise ( $F/F_0$ ) with different concentrations of Hairpin substrate 1.  $F_0$  and  $F$  are the fluorescence intensity in the absence and presence of  $100 \text{ U mL}^{-1}$  EcoRI, respectively. [MB] =  $200 \text{ nM}$ , [Exo III] =  $2.0 \text{ U mL}^{-1}$ .

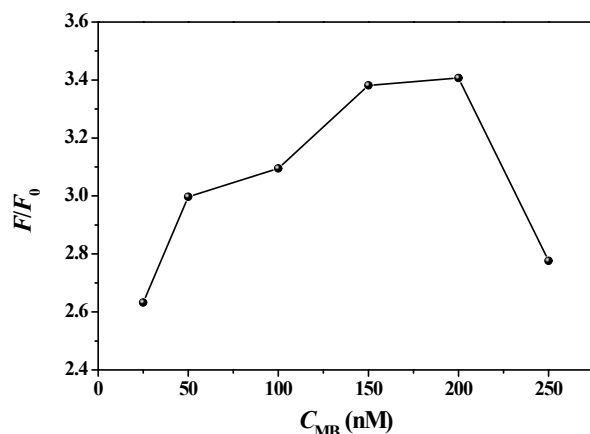

**Fig. S3** Signal-to-noise ( $F/F_0$ ) with different concentrations of MB.  $F_0$  and  $F$  are the fluorescence intensity in the absence and presence of  $100 \text{ U mL}^{-1}$  EcoRI, respectively. [Hairpin substrate 1] =  $100 \text{ nM}$ , [Exo III] =  $2.0 \text{ U mL}^{-1}$ .

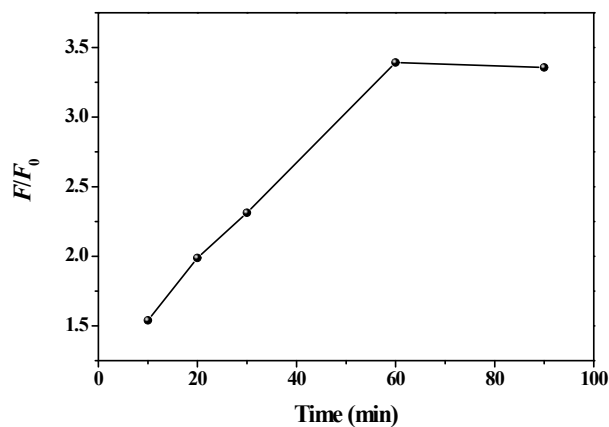

**Fig. S4** Signal-to-noise ( $F/F_0$ ) versus incubation time at  $37 \text{ }^\circ\text{C}$ .  $F_0$  and  $F$  are the fluorescence intensity in the absence and presence of  $100 \text{ U mL}^{-1}$  EcoRI, respectively. [Hairpin substrate 1] =  $100 \text{ nM}$ , [MB] =  $200 \text{ nM}$ , [EcoRI] =  $100 \text{ U mL}^{-1}$ , [Exo III] =  $2.0 \text{ U mL}^{-1}$ .

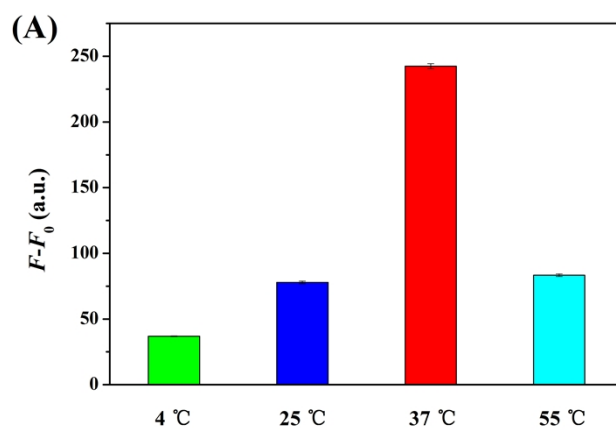

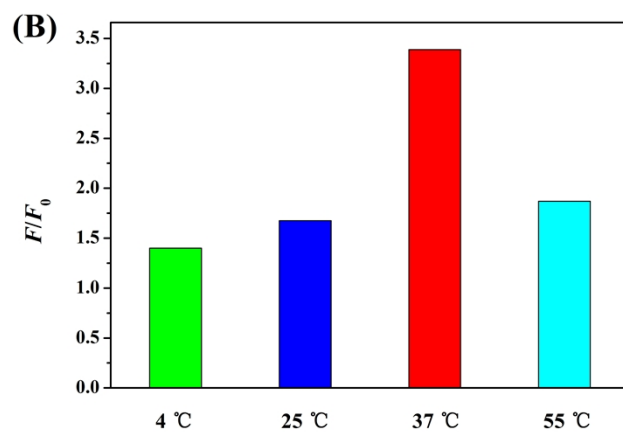

**Fig. S5** (A) Fluorescence enhancement and (B) signal-to-noise ( $F/F_0$ ) of this sensing method at different incubation temperature.  $F_0$  and  $F$  are the fluorescence intensity in the absence and presence of  $100 \text{ U mL}^{-1}$  EcoRI, respectively. [**Hairpin substrate 1**] =  $100 \text{ nM}$ , [**MB**] =  $200 \text{ nM}$ , [EcoRI] =  $100 \text{ U mL}^{-1}$ , [Exo III] =  $2.0 \text{ U mL}^{-1}$ .
